# Supplementary material for: 3D hierarchical Ni(PO3)2nanosheet arrays with superior electrochemical capacitance behavior
Source: Royal Society of Chemistry journal article supplement (doi:10.1039/c6ta09528c), 2016-12-14
Supplement: c6ta09528c1.pdf [file c6ta09528c1.pdf]

## Supporting Information for

### 3D Hierarchical Ni(PO<sub>3</sub>)<sub>2</sub> Nanosheet Arrays with Superior Electrochemical Capacitance Behaviors

Qiao Liu,<sup>a</sup> Chongyi Chen,<sup>b</sup> Jinju Zheng,<sup>a</sup> Lin Wang,<sup>a</sup> Zuobao Yang,<sup>a</sup> and  
Weiyu Yang<sup>a\*</sup>

<sup>a</sup> *Institute of Materials, Ningbo University of Technology, Ningbo 315016, P.R. China.*

<sup>b</sup> *School of Materials Science and Chemical Engineering, Ningbo University, Ningbo 315211, P.R. China.*

Corresponding author: [weiyuyang@tsinghua.org.cn](mailto:weiyuyang@tsinghua.org.cn) (W. Yang)

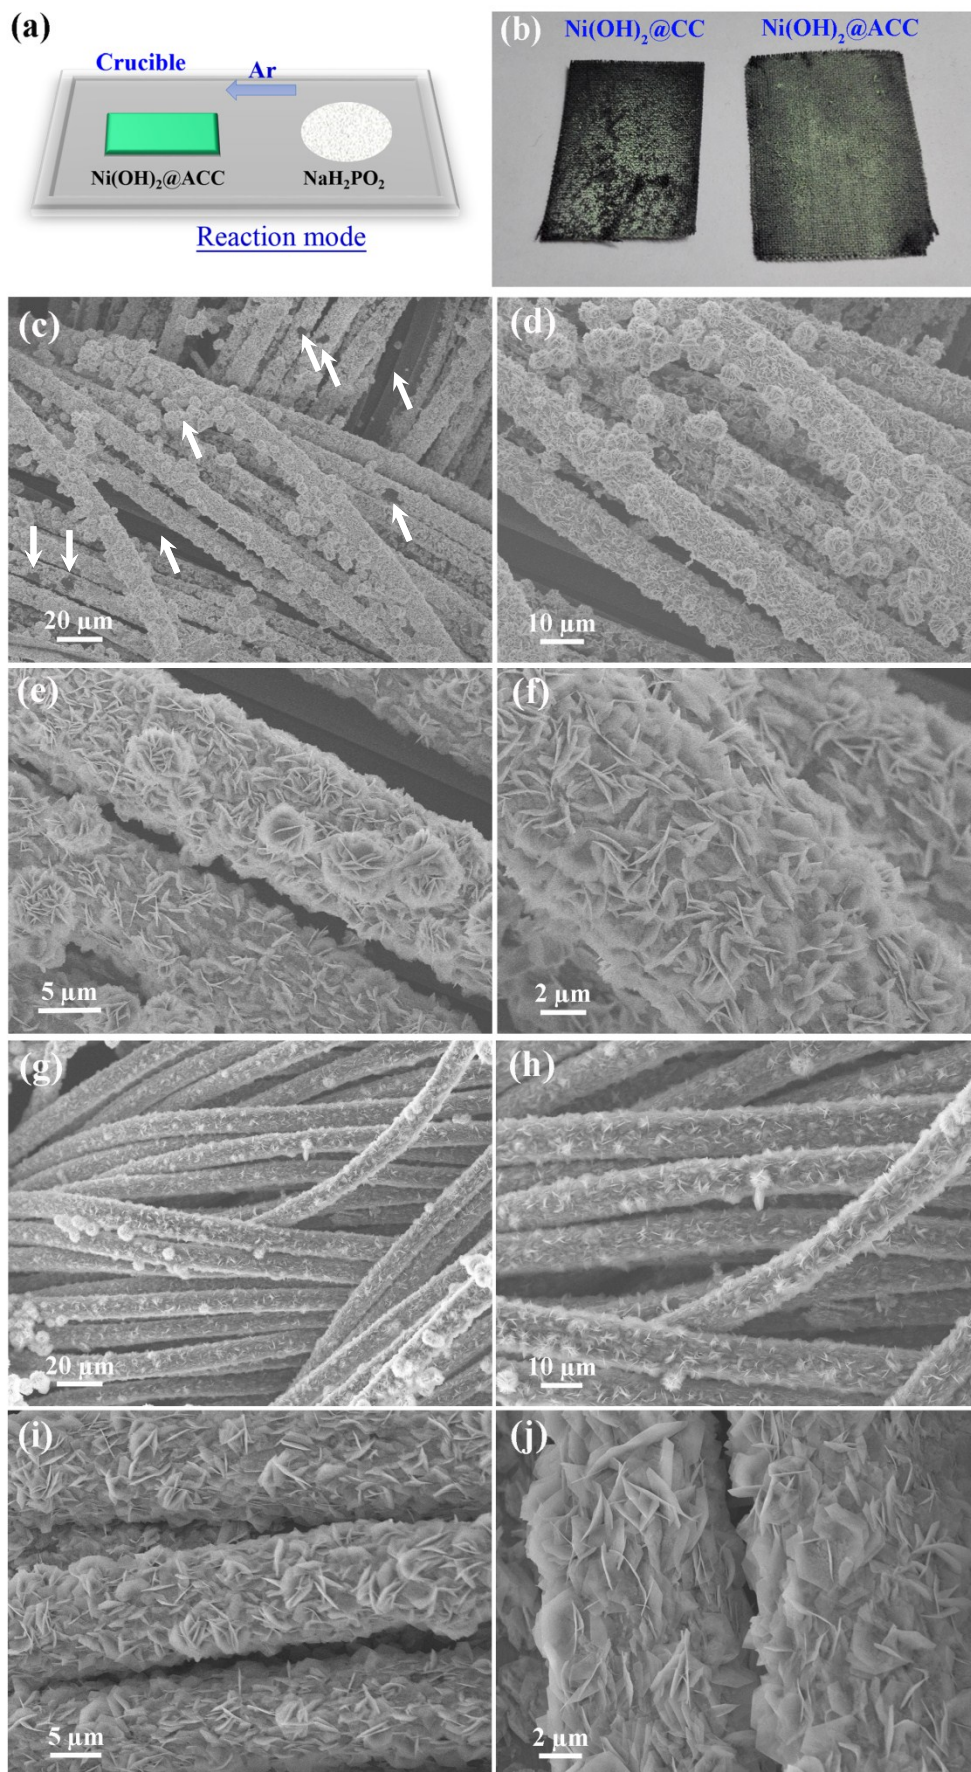

**Fig. S1** (a) Schematic illumination for the synthesis of 3D hierarchical  $\text{Ni(PO}_3)_2$

nanosheet arrays by the reaction of  $\text{Ni}(\text{OH})_2@\text{ACC}$  and  $\text{Na}_2\text{H}_2\text{PO}_2$ . (b) Digital photo of  $\text{Ni}(\text{OH})_2@\text{CC}$  and  $\text{Ni}(\text{OH})_2@\text{ACC}$ . (c-f) and (g-j) Typical SEM images of  $\text{Ni}(\text{OH})_2@\text{CC}$  and  $\text{Ni}(\text{OH})_2@\text{ACC}$  under different magnifications, respectively.

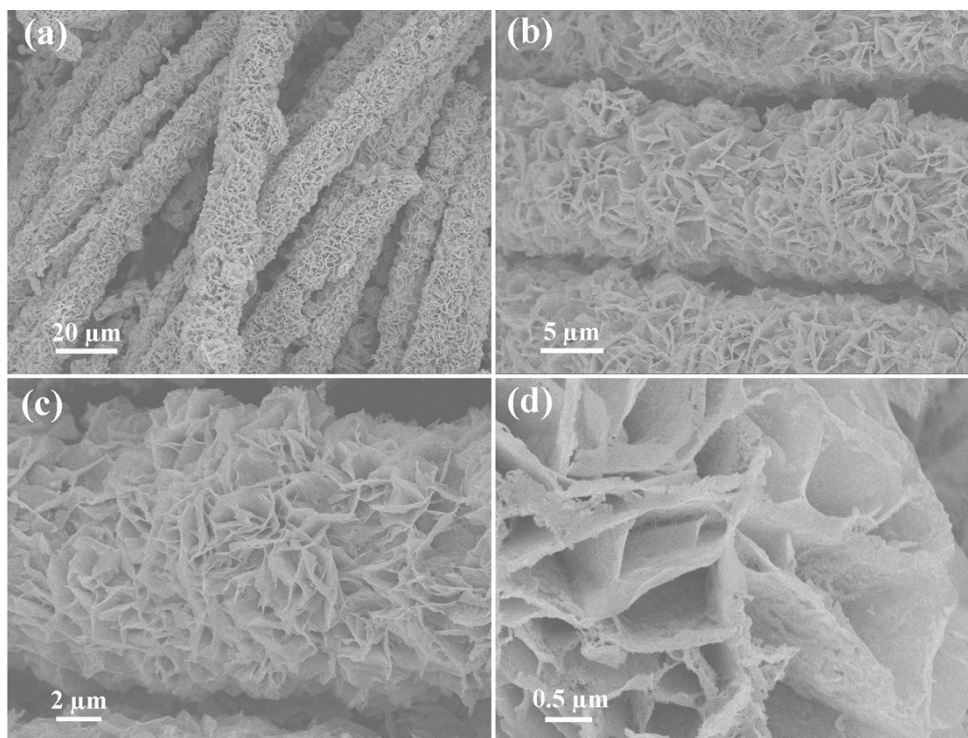

**Fig. S2** Typical SEM images under different magnifications of the resultant  $\text{Ni}(\text{PO}_3)_2@\text{ACC}$ .

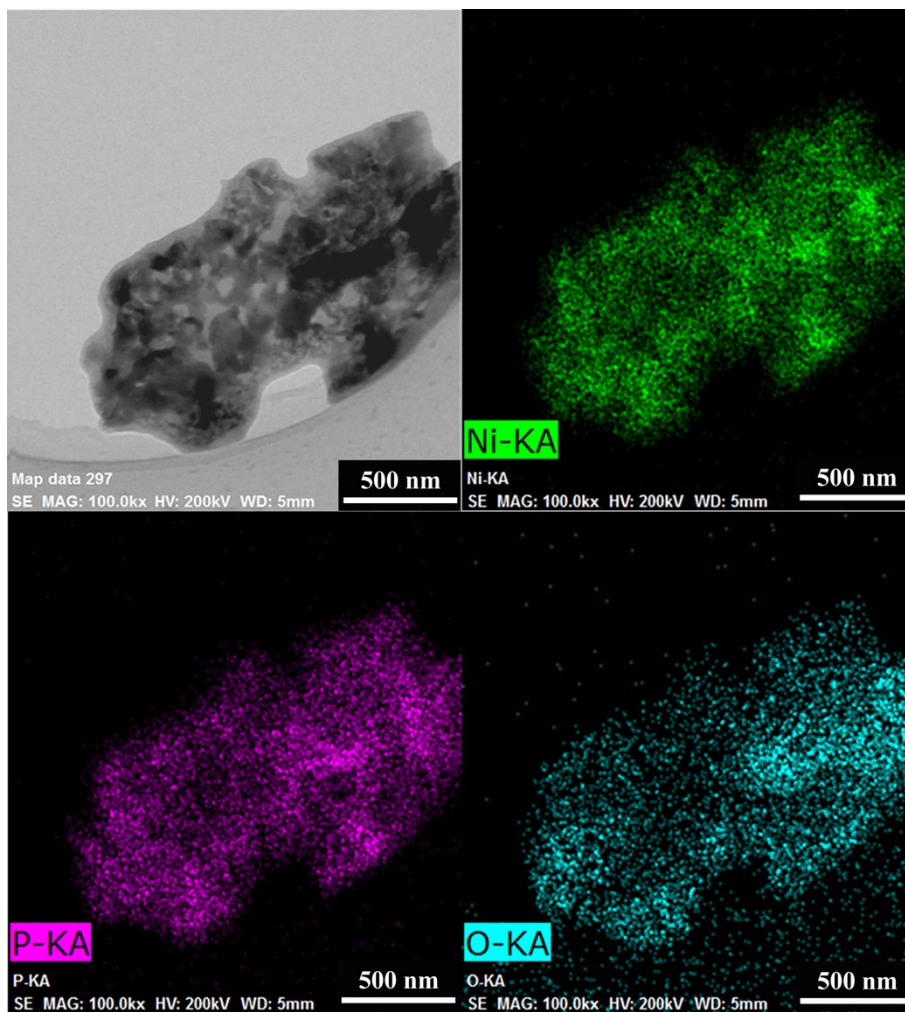

**Fig. S3** Elemental mappings of Ni, P and O within the  $\text{Ni}(\text{PO}_3)_2$  nanosheet.

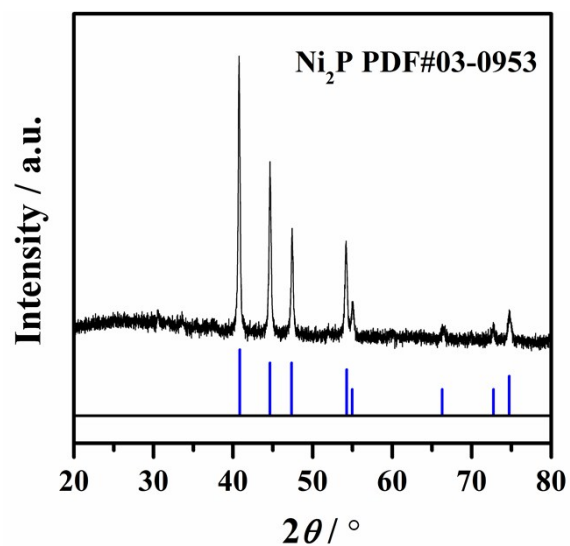

**Fig. S4** Typical XRD pattern of the obtained sample by annealing Ni(OH)<sub>2</sub> precursor powders and NaH<sub>2</sub>PO<sub>2</sub> without the use of ACC at 300 °C in Ar atmosphere.

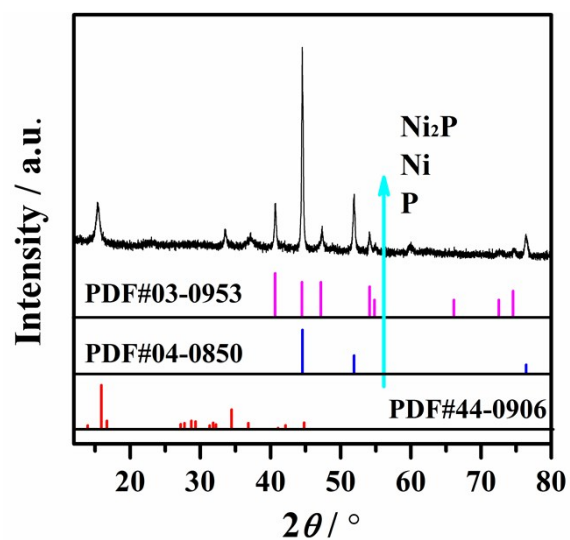

**Fig. S5** Typical XRD pattern of the resultant sample by the annealing of Ni(OH)<sub>2</sub> precursor powders and NaH<sub>2</sub>PO<sub>2</sub> at 250 °C in Ar atmosphere.

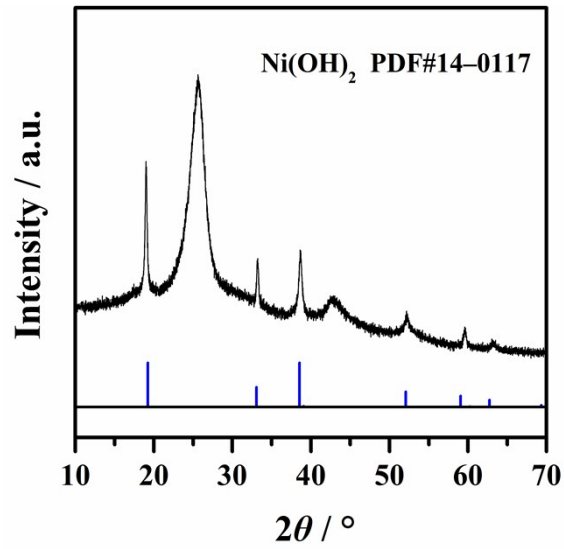

**Fig. S6** XRD pattern of the annealed Ni(OH)<sub>2</sub>@ACC that was obtained by the heat treatment of hydrothermally-obtained hybrid at 300 °C in Ar atmosphere.

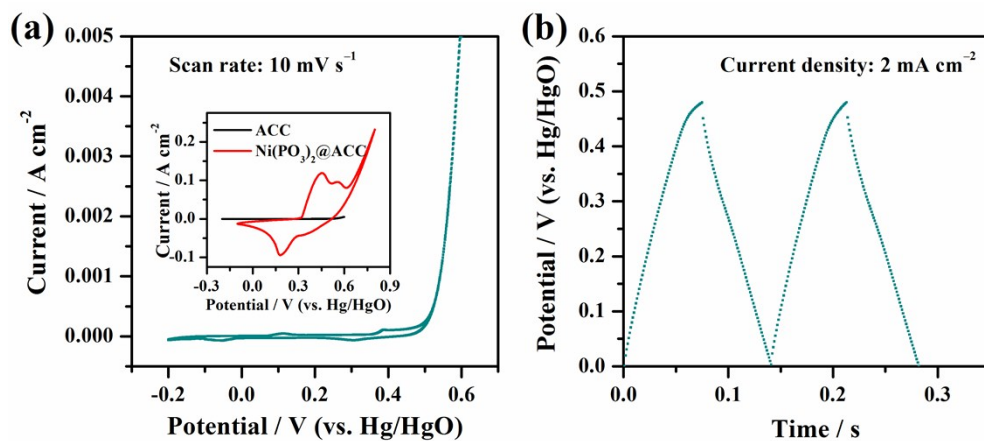

**Fig. S7** Typical CV (a) and GCD (b) curves of the pure ACC electrode. The inset in Fig. S7a displays the CV comparison between ACC and Ni(PO<sub>3</sub>)<sub>2</sub>@ACC electrodes at the same scan rate of 10 mV s<sup>-1</sup>. The *ca.* areal specific capacitance of ACC is 0.28 F cm<sup>-2</sup> at the discharge current of 2 mA cm<sup>-2</sup>.



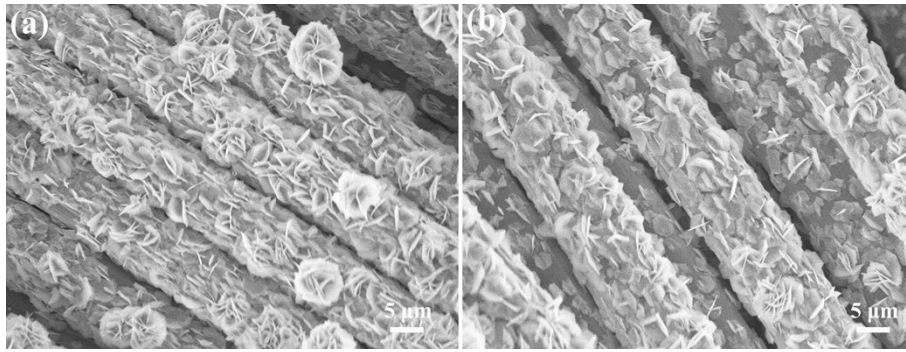

**Fig. S8** SEM images of  $\text{Ni}(\text{PO}_3)_2@ \text{ACC}$  electrodes cycled after 800 (a) and 2000 (b) times at the discharge current of  $10 \text{ mA cm}^{-2}$ .

**Table S1.** Summary of comparison experiments and the crystalline phases of the corresponding products.

| <b>Precursors</b>          | <b>Temperature / °C</b> | <b>Products</b>                        |
|----------------------------|-------------------------|----------------------------------------|
| Ni(OH) <sub>2</sub> powder | 250                     | Ni, Ni <sub>2</sub> P and P            |
|                            | 300                     | Ni <sub>2</sub> P                      |
| Ni(OH) <sub>2</sub> @ACC   | 250                     | Ni(OH) <sub>2</sub> @ACC               |
|                            | 300                     | Ni(PO <sub>3</sub> ) <sub>2</sub> @ACC |
|                            | 350                     | Ni(PO <sub>3</sub> ) <sub>2</sub> @ACC |

**Table S2.** Overview of the electrochemical performance of nickel-based electrode materials for ultracapacitors.

| Materials                                                                                                                     | Electrolytes                                  | Specific Capacitance                                                                                                    | Reference |
|-------------------------------------------------------------------------------------------------------------------------------|-----------------------------------------------|-------------------------------------------------------------------------------------------------------------------------|-----------|
| $\alpha$ -Ni(OH) <sub>2</sub> /graphene                                                                                       | 6 M KOH                                       | 1735 F g <sup>-1</sup> at 1 mV s <sup>-1</sup>                                                                          | 1         |
| $\beta$ -Ni(OH) <sub>2</sub> /graphite                                                                                        | 1 M KOH                                       | 1335 F g <sup>-1</sup> at 2.8 A g <sup>-1</sup>                                                                         | 2         |
| $\beta$ -Ni(OH) <sub>2</sub> /carbon cloth                                                                                    | 1 M NaOH                                      | 2675 F g <sup>-1</sup> at 5 mA cm <sup>-2</sup><br>7.85 F cm <sup>-2</sup> at 5 mA cm <sup>-2</sup>                     | 3         |
| amorphous Ni(OH) <sub>2</sub>                                                                                                 | 1 M KOH                                       | 1863 F g <sup>-1</sup> at 20 A g <sup>-1</sup>                                                                          | 4         |
| $\alpha$ -Ni(OH) <sub>2</sub> nanosheets                                                                                      | 6 M KOH                                       | 3270 F g <sup>-1</sup> at 4 A g <sup>-1</sup>                                                                           | 5         |
| mixture of $\alpha$ -Ni(OH) <sub>2</sub> and $\beta$ -Ni(OH) <sub>2</sub><br>/carbon fibers                                   | 1 M KOH                                       | 1416 F g <sup>-1</sup> at 1 A g <sup>-1</sup>                                                                           | 6         |
| NiCo <sub>2</sub> O <sub>4</sub> /Ni foam                                                                                     | 3 M KOH                                       | 2010 F g <sup>-1</sup> at 2 A g <sup>-1</sup>                                                                           | 7         |
| NiCo <sub>2</sub> O <sub>4</sub> /carbon foam                                                                                 | 6 M KOH                                       | 1231 F g <sup>-1</sup> at 2 A g <sup>-1</sup>                                                                           | 8         |
| NiCo <sub>2</sub> O <sub>4</sub> /carbon cloth                                                                                | 1 M KOH                                       | 245 F g <sup>-1</sup> at 1 A g <sup>-1</sup>                                                                            | 9         |
| NiCo <sub>2</sub> O <sub>4</sub> /carbon fabric                                                                               | 2 M KOH                                       | 2658 F g <sup>-1</sup> at 2 A g <sup>-1</sup>                                                                           | 10        |
| Co <sub>0.5</sub> Ni <sub>0.5</sub> double<br>hydroxide/NiCo <sub>2</sub> O <sub>4</sub><br>/carbon fiber paper               | 1 M NaOH                                      | 2.3 F cm <sup>-2</sup> at 2 mA cm <sup>-2</sup>                                                                         | 11        |
| Ni(OH) <sub>2</sub> -MnO <sub>2</sub> /Ni foam                                                                                | 1 M KOH                                       | 2628 F g <sup>-1</sup> at 3 A g <sup>-1</sup>                                                                           | 12        |
| NiCo <sub>2</sub> O <sub>4</sub> hollow spheres                                                                               | 6 M KOH                                       | 1141 F g <sup>-1</sup> at 1 A g <sup>-1</sup>                                                                           | 13        |
| Co <sub>0.5</sub> Mn <sub>0.4</sub> Ni <sub>0.1</sub> C <sub>2</sub> O <sub>4</sub> •nH <sub>2</sub> O                        | 3 M KOH                                       | 990 F g <sup>-1</sup> at 0.6 A g <sup>-1</sup>                                                                          | 14        |
| NiFe <sub>2</sub> O <sub>4</sub> /carbon cloth                                                                                | 1 M H <sub>2</sub> SO <sub>4</sub><br>6 M KOH | 1135.5 F g <sup>-1</sup> (H <sub>2</sub> SO <sub>4</sub> )<br>922.6 F g <sup>-1</sup> (KOH)<br>at 2 mA cm <sup>-2</sup> | 15        |
| $\alpha$ -NiS/carbon nanorods                                                                                                 | 2 M KOH                                       | 1092 F g <sup>-1</sup> at 1 A g <sup>-1</sup>                                                                           | 16        |
| flower-like $\beta$ -NiS                                                                                                      | 2 M KOH                                       | 857.76 F g <sup>-1</sup> at 2 A g <sup>-1</sup>                                                                         | 17        |
| hollow NiS <sub>2</sub> prisms                                                                                                | 2 M LiOH                                      | 1725 F g <sup>-1</sup> at 5 A g <sup>-1</sup>                                                                           | 18        |
| NiS <sub>2</sub> sponge                                                                                                       | 2 M KOH                                       | 1685 F g <sup>-1</sup> at 1 A g <sup>-1</sup>                                                                           | 19        |
| Ni <sub>3</sub> S <sub>2</sub> /Ni foam                                                                                       | 1M KOH                                        | 7.25 F cm <sup>-2</sup> at 5 mA cm <sup>-2</sup>                                                                        | 20        |
| NiCo <sub>2</sub> S <sub>4</sub> aerogel                                                                                      | 1 M NaOH                                      | 1400 F g <sup>-1</sup> at 25mV s <sup>-1</sup>                                                                          | 21        |
| NiCo <sub>2</sub> S <sub>4</sub> /graphene                                                                                    | 6 M KOH                                       | 1451 F g <sup>-1</sup> at 3 A g <sup>-1</sup>                                                                           | 22        |
| NiCo <sub>2</sub> S <sub>4</sub> /carbon cloth                                                                                | 1 M KOH                                       | 1418 F g <sup>-1</sup> at 5 A g <sup>-1</sup>                                                                           | 23        |
| Tube-like NiCo <sub>2</sub> S <sub>4</sub>                                                                                    | 6 M KOH                                       | 1048 F g <sup>-1</sup> at 3 A g <sup>-1</sup>                                                                           | 24        |
| Co <sub>x</sub> Ni <sub>1-x</sub> (OH) <sub>2</sub> /NiCo <sub>2</sub> S <sub>4</sub> nanotube<br>array on carbon fiber paper | 1 M KOH                                       | 2.86 F cm <sup>-2</sup> at 4 mA cm <sup>-2</sup>                                                                        | 25        |
| Ni <sub>2</sub> P particles                                                                                                   | 2 M KOH                                       | 843.25 F g <sup>-1</sup> at 1 A g <sup>-1</sup>                                                                         | 26        |
| Ni <sub>2</sub> P/Ni foam                                                                                                     | 2 M LiOH                                      | 581 F g <sup>-1</sup> at 1 A g <sup>-1</sup>                                                                            | 27        |
| Ni <sub>2</sub> P/graphene                                                                                                    | 2 M KOH                                       | 2266 F g <sup>-1</sup> at 5 mA cm <sup>-2</sup>                                                                         | 28        |
| NH <sub>4</sub> NiPO <sub>4</sub> •H <sub>2</sub> O nanoalmonds                                                               | 3 M KOH                                       | 1072 F g <sup>-1</sup> at 1.5 A g <sup>-1</sup>                                                                         | 29        |

|                                                                                                                 |                    |                                                                                                    |           |
|-----------------------------------------------------------------------------------------------------------------|--------------------|----------------------------------------------------------------------------------------------------|-----------|
| Ni <sub>11</sub> (HPO <sub>3</sub> ) <sub>8</sub> (OH) <sub>6</sub> nanotube assembly                           | 1 M KOH<br>3 M KOH | 687 F g <sup>-1</sup> (1 M KOH)<br>1876 F g <sup>-1</sup> (3 M KOH )<br>at 0.625 A g <sup>-1</sup> | 30        |
| amorphous NiWO <sub>4</sub> nanostructure                                                                       | 2 M KOH            | 586.2 F g <sup>-1</sup> at 0.5 A g <sup>-1</sup>                                                   | 31        |
| Co <sub>3</sub> O <sub>4</sub> -Ni <sub>3</sub> (VO <sub>4</sub> ) <sub>2</sub> nanorods/Ni foam                | 2 M KOH            | 1401 F g <sup>-1</sup> at 0.5 A g <sup>-1</sup>                                                    | 32        |
| NiCo <sub>2</sub> S <sub>4</sub> @Ni <sub>3</sub> V <sub>2</sub> O <sub>8</sub> core/shell hybrid /Ni foam      | 2 M KOH            | 512 C g <sup>-1</sup> at 1 A g <sup>-1</sup>                                                       | 33        |
| Ni(HCO <sub>3</sub> ) <sub>2</sub> /graphene                                                                    | 6 M KOH            | 1200 F g <sup>-1</sup> at 4 A g <sup>-1</sup>                                                      | 34        |
| Ni(HCO <sub>3</sub> ) <sub>2</sub> /Ni foam                                                                     | 2 M KOH            | 2128.57 F g <sup>-1</sup> at 2.5 mA cm <sup>-2</sup>                                               | 35        |
| NiMoO <sub>4</sub> / Ni foam                                                                                    | 3 M KOH            | 3.4 F cm <sup>-2</sup> (2138 F g <sup>-1</sup> )<br>at 2 mA cm <sup>-2</sup>                       | 36        |
| Ni <sub>11</sub> (HPO <sub>3</sub> ) <sub>8</sub> (OH) <sub>6</sub> nanoribbons                                 | 3 M KOH            | 1876 F g <sup>-1</sup> at 0.625 A g <sup>-1</sup>                                                  | 37        |
| NiCo <sub>2</sub> (PO <sub>4</sub> ) <sub>2</sub> hollow shells                                                 | 3 M KOH            | 940.43 F g <sup>-1</sup> at ~1 A g <sup>-1</sup>                                                   | 38        |
| Ni <sub>2</sub> P <sub>2</sub> O <sub>7</sub> /porous carbon                                                    | 1 M NaOH           | 1893 F g <sup>-1</sup> at 2 A g <sup>-1</sup>                                                      | 39        |
| Ni <sub>3</sub> P <sub>2</sub> O <sub>8</sub> -Co <sub>3</sub> P <sub>2</sub> O <sub>8</sub> ·8H <sub>2</sub> O | 6 M KOH            | 1974 F g <sup>-1</sup> at 0.5 A g <sup>-1</sup>                                                    | 40        |
| Ni-MOF-derived porous Ni <sub>x</sub> P <sub>y</sub> O <sub>z</sub>                                             | 2 M KOH            | 1627 F g <sup>-1</sup> at 1 A g <sup>-1</sup>                                                      | 41        |
| Ni@NiO core-shell nanoparticle tube arrays                                                                      | 1 M NaOH           | 263 F g <sup>-1</sup> at 2.2 A g <sup>-1</sup>                                                     | 42        |
| NiO/Ni composites                                                                                               | 2 M KOH            | 1204 C g <sup>-1</sup> at 1 A g <sup>-1</sup>                                                      | 43        |
| Ni(PO <sub>3</sub> ) <sub>2</sub> @activated carbon cloth                                                       | 3 M KOH            | 2237 F g <sup>-1</sup> at ~1 A g <sup>-1</sup>                                                     | This work |

**Table S3.** Overview of the electrochemical performances of transition metal phosphates for ultracapacitor electrodes.

| <b>Materials</b>                                                                                                                                                      | <b>Electrolytes</b> | <b>Specific capacitance</b>                           | <b>Reference</b> |
|-----------------------------------------------------------------------------------------------------------------------------------------------------------------------|---------------------|-------------------------------------------------------|------------------|
| $\text{NH}_4\text{NiPO}_4 \cdot \text{H}_2\text{O}$                                                                                                                   | 3 M KOH             | 1072 F $\text{g}^{-1}$ at 1.5 A $\text{g}^{-1}$       | 29               |
| $\text{Ni}_{11}(\text{HPO}_3)_8(\text{OH})_6$                                                                                                                         | 3 M KOH             | 1876 F $\text{g}^{-1}$ at 0.625 A $\text{g}^{-1}$     | 37               |
| $\text{Co}_{11}(\text{HPO}_3)_8(\text{OH})_6$                                                                                                                         | 3 M KOH             | 312 F $\text{g}^{-1}$ at 1.25 A $\text{g}^{-1}$       | 37               |
| $\text{NH}_4\text{CoPO}_4 \cdot \text{H}_2\text{O}$                                                                                                                   | 3 M KOH             | 340 F $\text{g}^{-1}$ at 1.5 A $\text{g}^{-1}$        | 44               |
| $\text{CoHPO}_4 \cdot 3\text{H}_2\text{O}$                                                                                                                            | 3 M KOH             | 413 F $\text{g}^{-1}$ at 1.5 A $\text{g}^{-1}$        | 45               |
| $\text{Co}_2\text{P}_2\text{O}_7$                                                                                                                                     | 3 M KOH             | 367 F $\text{g}^{-1}$ at 0.625 A $\text{g}^{-1}$      | 45               |
| Mixed phases of<br>$(\text{Ni},\text{Co})_3(\text{PO}_4)_2 \cdot 8\text{H}_2\text{O}$<br>$(\text{NH}_4)(\text{Ni},\text{Co})\text{PO}_4 \cdot 0.67\text{H}_2\text{O}$ | 6 M KOH             | 1128 F $\text{g}^{-1}$ at 0.5 A $\text{g}^{-1}$       | 46               |
| $\text{Mn}_3(\text{PO}_4)_2 \cdot 3\text{H}_2\text{O}$                                                                                                                | 6 M KOH             | 2086 F $\text{g}^{-1}$ at 1 mV $\text{s}^{-1}$        | 47               |
| $\text{Ni}_2\text{P}_2\text{O}_7/\text{C}$                                                                                                                            | 1 M NaOH            | 1893 F $\text{g}^{-1}$ at 2 A $\text{g}^{-1}$         | 39               |
| $\text{Co}_{0.86}\text{Ni}_{2.14}(\text{PO}_4)_2$                                                                                                                     | 6 M KOH             | 1409 F $\text{g}^{-1}$ at 0.25 A $\text{g}^{-1}$      | 48               |
| $\text{NiCo}_2(\text{PO}_4)_2$                                                                                                                                        | 3 M KOH             | 940.4 F $\text{g}^{-1}$ at $\sim 1$ A $\text{g}^{-1}$ | 38               |
| $\text{Ni}(\text{PO}_3)_2$ @activated carbon<br>cloth                                                                                                                 | 3 M KOH             | 2237 F $\text{g}^{-1}$ at $\sim 1$ A $\text{g}^{-1}$  | This work        |

**Table S4.** Overview of the electrochemical performances of supported inorganic composites for ultracapacitor electrodes.

| Materials                                                                                                               | Electrolytes                                  | Areal capacitance                                                                                                | Reference |
|-------------------------------------------------------------------------------------------------------------------------|-----------------------------------------------|------------------------------------------------------------------------------------------------------------------|-----------|
| $\alpha$ -Ni(OH) <sub>2</sub> /Ni foam                                                                                  | 3% KOH                                        | 1.58 at 2 mA cm <sup>-2</sup><br>Loading: 0.5 mg cm <sup>-2</sup>                                                | 49        |
| $\beta$ -Ni(OH) <sub>2</sub> /carbon cloth                                                                              | 1 M NaOH                                      | 7.85 at 5 mA cm <sup>-2</sup><br>Loading: 2.93 mg cm <sup>-2</sup>                                               | 3         |
| NiCo <sub>2</sub> O <sub>4</sub> /Ni foam                                                                               | 2 M KOH                                       | 1.83 at 18 mA cm <sup>-2</sup><br>Loading: 3 mg cm <sup>-2</sup>                                                 | 50        |
| Co <sub>0.5</sub> Ni <sub>0.5</sub> double hydroxide/NiCo <sub>2</sub> O <sub>4</sub> / carbon fiber paper              | 1 M NaOH                                      | 2.3 at 2 mA cm <sup>-2</sup><br>Loading: 0.5 mg cm <sup>-2</sup>                                                 | 11        |
| NiFe <sub>2</sub> O <sub>4</sub> /carbon cloth                                                                          | 1 M H <sub>2</sub> SO <sub>4</sub><br>6 M KOH | 1.76 (H <sub>2</sub> SO <sub>4</sub> ), 1.43 (KOH) at 2 mA cm <sup>-2</sup><br>Loading: 1.55 mg cm <sup>-2</sup> | 15        |
| Co <sub>x</sub> Ni <sub>1-x</sub> (OH) <sub>2</sub> /NiCo <sub>2</sub> S <sub>4</sub> nanotube array/carbon fiber paper | 1 M KOH                                       | 2.86 at 4 mA cm <sup>-2</sup><br>Loading: 7.8 mg cm <sup>-2</sup>                                                | 25        |
| NiCo <sub>2</sub> S <sub>4</sub> /carbon cloth                                                                          | 1 M KOH                                       | 0.567 at 2 mA cm <sup>-2</sup><br>Loading: 0.4 mg cm <sup>-2</sup>                                               | 23        |
| activated carbon cloth                                                                                                  | 1 M H <sub>2</sub> SO <sub>4</sub>            | ~0.076 at 5 mA cm <sup>-2</sup>                                                                                  | 51        |
| NiCo <sub>2</sub> O <sub>4</sub> @MnO <sub>2</sub> /Ni foam                                                             | 1.0 M LiOH                                    | 3.31 at 2 mV s <sup>-1</sup><br>Loading: 1.4 mg cm <sup>-2</sup>                                                 | 52        |
| Co <sub>9</sub> S <sub>8</sub> /carbon cloth                                                                            | 3 M KOH                                       | 2.35 at 5 mA cm <sup>-2</sup>                                                                                    | 53        |
| Co <sub>3</sub> O <sub>4</sub> @RuO <sub>2</sub> /carbon cloth                                                          | 3 M KOH                                       | 1.18 at 1 mV s <sup>-1</sup><br>Loading: 2 mg cm <sup>-2</sup>                                                   | 53        |
| NiO-TiO <sub>2</sub> /Ti foil                                                                                           | 1 M KOH                                       | 3 at 0.4 mA cm <sup>-2</sup>                                                                                     | 54        |
| Co <sub>3</sub> O <sub>4</sub> @MnO <sub>2</sub> /stainless steel                                                       | 1.0 M LiOH                                    | 0.56 at 11.25 mA cm <sup>-2</sup><br>Loading: 1.5 mg cm <sup>-2</sup>                                            | 55        |
| Co <sub>3</sub> O <sub>4</sub> @NiO/Ni foam                                                                             | 2 M KOH                                       | 1.35 at 6 mA cm <sup>-2</sup><br>Loading: 3 mg cm <sup>-2</sup>                                                  | 56        |
| WO <sub>3-x</sub> @Au@MnO <sub>2</sub> /carbon fabric                                                                   | 0.1 M Na <sub>2</sub> SO <sub>4</sub>         | ~0.37 at 0.23 mA cm <sup>-2</sup><br>MnO <sub>2</sub> loading: 0.31 mg cm <sup>-2</sup>                          | 57        |
| Fe <sub>2</sub> O <sub>3</sub> /carbon cloth                                                                            | 2.0 M Li <sub>2</sub> SO <sub>4</sub>         | 1.784 at 2.0 mA cm <sup>-2</sup><br>Loading: 1.8 mg cm <sup>-2</sup>                                             | 58        |
| NiCo <sub>2</sub> O <sub>4</sub> @Ni foam                                                                               | 6 M KOH                                       | 2.1 F cm <sup>-2</sup> at 1 mA cm <sup>-2</sup><br>Loading: 2.62 mg cm <sup>-2</sup>                             | 59        |
| Ni(PO <sub>3</sub> ) <sub>2</sub> @activated carbon cloth                                                               | 3 M KOH                                       | 4.43 at 2 mA cm <sup>-2</sup><br>Loading: 1.98 mg cm <sup>-2</sup>                                               | This work |

## References

1. J. Yan, Z. Fan, W. Sun, G. Ning, T. Wei, Q. Zhang, R. Zhang, L. Zhi and F. Wei, *Adv. Func. Mater.*, 2012, **22**, 2632-2641.
2. H. Wang, H. S. Casalongue, Y. Liang and H. Dai, *J. Am. Chem. Soc.*, 2010, **132**, 7472-7477.
3. Z. Lu, Z. Chang, W. Zhu and X. Sun, *Chem. Commun.*, 2011, **47**, 9651-9653.
4. H. B. Li, M. H. Yu, F. X. Wang, P. Liu, Y. Liang, J. Xiao, C. X. Wang, Y. X. Tong and G. W. Yang, *Nat Commun*, 2013, **4**, 1894.
5. Y. Zhu, C. Cao, S. Tao, W. Chu, Z. Wu and Y. Li, *Sci. Rep.*, 2014, **4**, 5787.
6. N. A. Alhebshi, R. B. Rakhi and H. N. Alshareef, *J. Mater. Chem. A*, 2013, **1**, 14897-14903.
7. C. Yuan, J. Li, L. Hou, X. Zhang, L. Shen and X. W. Lou, *Adv. Func. Mater.*, 2012, **22**, 4592-4597.
8. L. Shen, J. Wang, G. Xu, H. Li, H. Dou and X. Zhang, *Adv. Energy Mater.*, 2014, **5**, DOI: 10.1002/aenm.201400977.
9. H. Wang and X. Wang, *ACS Appl. Mater. Interfaces*, 2013, **5**, 6255-6260.
10. J. Du, G. Zhou, H. Zhang, C. Cheng, J. Ma, W. Wei, L. Chen and T. Wang, *ACS Appl. Mater. Interfaces*, 2013, **5**, 7405-7409.
11. L. Huang, D. Chen, Y. Ding, S. Feng, Z. L. Wang and M. Liu, *Nano Lett.*, 2013, **13**, 3135-3139.
12. H. Chen, L. Hu, Y. Yan, R. Che, M. Chen and L. Wu, *Adv. Energy Mater.*, 2013, **3**, 1636-1646.
13. L. Shen, L. Yu, X.-Y. Yu, X. Zhang and X. W. Lou, *Angew. Chem. Int. Ed.*, 2015, **54**, 1868-1872.
14. Y.-Z. Zhang, J. Zhao, J. Xia, L. Wang, W.-Y. Lai, H. Pang and W. Huang, *Sci. Rep.*, 2015, **5**, 8536.
15. Z.-Y. Yu, L.-F. Chen and S.-H. Yu, *J. Mater. Chem. A*, 2014, **2**, 10889-10894.
16. C. Sun, M. Ma, J. Yang, Y. Zhang, P. Chen, W. Huang and X. Dong, *Sci. Rep.*, 2014, **4**, 7054.
17. J. Yang, X. Duan, Q. Qin and W. Zheng, *J Mater. Chem. A*, 2013, **1**, 7880-7884.
18. Z. Dai, X. Zang, J. Yang, C. Sun, W. Si, W. Huang and X. Dong, *ACS App. Mater. Interfaces*, 2015, **7**, 25396-25401.
19. W. Ni, B. Wang, J. Cheng, X. Li, Q. Guan, G. Gu and L. Huang, *Nanoscale*, 2014, **6**, 2618-2623.
20. G. Yilmaz and X. Lu, *ChemNanoMat*, 2016, DOI: 10.1002/cnma.201600070, n/a-n/a.
21. T.-Y. Wei, C.-H. Chen, H.-C. Chien, S.-Y. Lu and C.-C. Hu, *Adv. Mater.*, 2010, **22**, 347-351.
22. S. Peng, L. Li, C. Li, H. Tan, R. Cai, H. Yu, S. Mhaisalkar, M. Srinivasan, S. Ramakrishna and Q. Yan, *Chem. Commun.*, 2013, **49**, 10178-10180.
23. W. Chen, C. Xia and H. N. Alshareef, *ACS Nano*, 2014, **8**, 9531-9541.

24. Y. Zhang, M. Ma, J. Yang, C. Sun, H. Su, W. Huang and X. Dong, *Nanoscale*, 2014, **6**, 9824-9830.
25. J. Xiao, L. Wan, S. Yang, F. Xiao and S. Wang, *Nano Lett.*, 2014, **14**, 831-838.
26. D. Wang, L.-B. Kong, M.-C. Liu, Y.-C. Luo and L. Kang, *Chem. Eur. J.*, 2015, **21**, 17897-17903.
27. Y. Lu, J.-k. Liu, X.-y. Liu, S. Huang, T.-q. Wang, X.-l. Wang, C.-d. Gu, J.-p. Tu and S. X. Mao, *CrystEngComm*, 2013, **15**, 7071-7079.
28. C. An, Y. Wang, Y. Wang, G. Liu, L. Li, F. Qiu, Y. Xu, L. Jiao and H. Yuan, *RSC Adv.*, 2013, **3**, 4628-4633.
29. J. Zhao, H. Pang, J. Deng, Y. Ma, B. Yan, X. Li, S. Li, J. Chen and W. Wang, *CrystEngComm*, 2013, **15**, 5950-5955.
30. H. Pang, C. Wei, Y. Ma, S. Zhao, G. Li, J. Zhang, J. Chen and S. Li, *ChemPlusChem*, 2013, **78**, 546-553.
31. L. Niu, Z. Li, Y. Xu, J. Sun, W. Hong, X. Liu, J. Wang and S. Yang, *ACS Appl. Mater. Interfaces*, 2013, **5**, 8044-8052.
32. W.-B. Zhang, L.-B. Kong, X.-J. Ma, Y.-C. Luo and L. Kang, *New J. Chem.*, 2014, **38**, 3236-3241.
33. L. Niu, Y. Wang, F. Ruan, C. Shen, S. Shan, M. Xu, Z. Sun, C. Li, X. Liu and Y. Gong, *J. Mater. Chem. A*, 2016, **4**, 5669-5677.
34. J. Sun, Z. Li, J. Wang, Z. Wang, L. Niu, P. Gong, X. Liu, H. Wang and S. Yang, *J. Alloys Comp.*, 2013, **581**, 217-222.
35. L. Long, W. Fu, M. Yan, Y. Yao, H. Wang, M. Wang, X. Liao, G. Yin and Z. Huang, *Electrochim. Acta*, 2015, **180**, 330-338.
36. L. Huang, J. Xiang, W. Zhang, C. Chen, H. Xu and Y. Huang, *J. Mater. Chem. A*, 2015, **3**, 22081-22087.
37. H. Pang, Y. Liu, J. Li, Y. Ma, G. Li, Y. Ai, J. Chen, J. Zhang and H. Zheng, *Nanoscale*, 2013, **5**, 503-507.
38. J. Zhang, Y. Yang, Z. Zhang, X. Xu and X. Wang, *J. Mater. Chem. A*, 2014, **2**, 20182-20188.
39. B. Senthilkumar, Z. Khan, S. Park, K. Kim, H. Ko and Y. Kim, *J. Mater. Chem. A*, 2015, **3**, 21553-21561.
40. M.-C. Liu, J.-J. Li, Y.-X. Hu, Q.-Q. Yang and L. Kang, *Electrochim. Acta*, 2016, **201**, 142-150.
41. R. Bendi, V. Kumar, V. Bhavanasi, K. Parida and P. S. Lee, *Adv. Energy Mater.*, 2016, **6**, DOI: 10.1002/aenm.201501833.
42. Q. Li, C.-L. Liang, X.-F. Lu, Y.-X. Tong and G.-R. Li, *J. Mater. Chem. A*, 2015, **3**, 6432-6439.
43. H. Lai, Q. Wu, J. Zhao, L. Shang, H. Li, R. Che, Z. Lyu, J. Xiong, L. Yang, X. Wang and Z. Hu, *Energy Environ. Sci.*, 2016, **9**, 2053-2060.
44. H. Pang, Z. Yan, W. Wang, J. Chen, J. Zhang and H. Zheng, *Nanoscale*, 2012, **4**, 5946-5953.



45. H. Pang, S. Wang, W. Shao, S. Zhao, B. Yan, X. Li, S. Li, J. Chen and W. Du, *Nanoscale*, 2013, **5**, 5752-5757.
46. Y. Zhao, Z. Chen, D.-B. Xiong, Y. Qiao, Y. Tang and F. Gao, *Sci. Rep.*, 2016, **6**, 17613.
47. C. Yang, L. Dong, Z. Chen and H. Lu, *J. Phys. Chem. C*, 2014, **118**, 18884-18891.
48. Y. Tang, Z. Liu, W. Guo, T. Chen, Y. Qiao, S. Mu, Y. Zhao and F. Gao, *Electrochim. Acta*, 2016, **190**, 118-125.
49. G.-W. Yang, C.-L. Xu and H.-L. Li, *Chem. Commun.*, 2008, **48**, 6537-6539.
50. Y. Chen, B. Qu, L. Hu, Z. Xu, Q. Li and T. Wang, *Nanoscale*, 2013, **5**, 9812-9820.
51. G. Wang, H. Wang, X. Lu, Y. Ling, M. Yu, T. Zhai, Y. Tong and Y. Li, *Adva. Mater.*, 2014, **26**, 2676-2682.
52. L. Yu, G. Zhang, C. Yuan and X. W. Lou, *Chem. Commun.*, 2013, **49**, 137-139.
53. H. Pang, Z. Yan, Y. Wei, X. Li, J. Li, L. Zhang, J. Chen, J. Zhang and H. Zheng, *Part. Part. Syst. Char.*, 2013, **30**, 287-295.
54. J.-H. Kim, K. Zhu, Y. Yan, C. L. Perkins and A. J. Frank, *Nano Lett.*, 2010, **10**, 4099-4104.
55. J. Liu, J. Jiang, C. Cheng, H. Li, J. Zhang, H. Gong and H. J. Fan, *Adv. Mater.*, 2011, **23**, 2076-2081.
56. X. Xia, J. Tu, Y. Zhang, X. Wang, C. Gu, X.-b. Zhao and H. J. Fan, *ACS Nano*, 2012, **6**, 5531-5538.
57. X. Lu, T. Zhai, X. Zhang, Y. Shen, L. Yuan, B. Hu, L. Gong, J. Chen, Y. Gao, J. Zhou, Y. Tong and Z. L. Wang, *Adv. Mater.*, 2012, **24**, 938-944.
58. L.-F. Chen, Z.-Y. Yu, X. Ma, Z.-Y. Li and S.-H. Yu, *Nano Energy*, 2014, **9**, 345-354.
59. D. S. Sun, Y. H. Li, Z. Y. Wang, X. P. Cheng, S. Jaffer and Y. F. Zhang, *J. Mater. Chem. A*, 2016, **4**, 5198-5204.
